# Supplementary material
Source: PubMed Central journal article supplement (PMC2532920)
Supplement: NIHMS62954-supplement-1si20060829_10.pdf [file NIHMS62954-supplement-1si20060829_10.pdf]

Supplemental Table 1. Global analysis of the cervical-vaginal proteome in pregnant rhesus monkeys using multidimensional protein identification technology (MudPIT) and gel-based fractionation (1D PAGE LC-MS/MS).

| Swiss-Prot ID | Protein Name                                                                                         |
|---------------|------------------------------------------------------------------------------------------------------|
| O60218        | Aldo-keto reductase family 1, member B10 (aldose reductase)                                          |
| O00394        | Alpha-1-antitrypsin                                                                                  |
| P01023        | Alpha-2-macroglobulin                                                                                |
| P12429        | Annexin A3                                                                                           |
| P31941        | Apolipoprotein B mRNA editing enzyme, catalytic polypeptide-like 3A                                  |
| Q8N4F0        | Bactericidal/permeability-increasing protein-like 1                                                  |
| P30043        | Biliverdin reductase B (flavin reductase (NADPH))                                                    |
| P08758        | Calphobindin I                                                                                       |
| P01040        | Cystatin A (stefin A)                                                                                |
| O19092        | Cystatin C precursor                                                                                 |
| Q28514        | GST class-pi                                                                                         |
| P04196        | Histidine-rich glycoprotein                                                                          |
| Q9BE24        | LDH muscle subunit                                                                                   |
| P48737        | Phosphatidylethanolamine-binding protein                                                             |
| P30086        | Prostatic binding protein                                                                            |
| P03973        | Secretory leukocyte protease inhibitor (antileukoprotease)                                           |
| P30740        | Serine (or cysteine) proteinase inhibitor, clade B (ovalbumin), member 1                             |
| Q862Z5        | Stefin B                                                                                             |
| Q8HXQ1        | Superoxide dismutase [Cu-Zn]                                                                         |
| O15143        | Actin related protein 2/3 complex, subunit 1B, 41kDa                                                 |
| O15511        | Actin related protein 2/3 complex, subunit 5, 16kDa                                                  |
| P60709        | Actin, beta                                                                                          |
| P12814        | Actinin, alpha 1                                                                                     |
| O43707        | Actinin, alpha 4                                                                                     |
| P61160        | ARP2 actin-related protein 2 homolog (yeast)                                                         |
| P61158        | ARP3 actin-related protein 3 homolog (yeast)                                                         |
| P47756        | Capping protein (actin filament) muscle Z-line, beta                                                 |
| P60981        | Dextrin                                                                                              |
| P28676        | Grancalcin, EF-hand calcium binding protein                                                          |
| P26038        | Moesin                                                                                               |
| P07737        | Profilin 1                                                                                           |
| Q9Y6U3        | Scinderin                                                                                            |
| P62328        | Thymosin beta-4                                                                                      |
| Q5ISQ2        | Clusterin (Fragment).                                                                                |
| P31146        | Coronin, actin binding protein, 1A                                                                   |
| P01033        | Erythroid potentiating activity                                                                      |
| P02679        | Fibrinogen, gamma polypeptide                                                                        |
| P15170        | G1 to S phase transition 1                                                                           |
| P26583        | High-mobility group box 2                                                                            |
| Q06830        | Peroxiredoxin 1                                                                                      |
| P24158        | Proteinase 3 (serine proteinase, neutrophil, Wegener granulomatosis autoantigen)                     |
| P26447        | S100 calcium binding protein A4 (calcium protein, calvasculin, metastasin, murine placental homolog) |

|        |                                                                                                   |
|--------|---------------------------------------------------------------------------------------------------|
| P06703 | S100 calcium binding protein A6 (calcyclin)                                                       |
| P36955 | Pigment epithelium-derived factor Precursor                                                       |
| P68293 | Apolipoprotein A-I precursor                                                                      |
| P21766 | Hemoglobin alpha-1, alpha-2, and alpha-3 chains                                                   |
| Q311S1 | Vesicle amine transport protein 1 (Fragment).                                                     |
| P02768 | Albumin                                                                                           |
| P09525 | Annexin A4                                                                                        |
| P80723 | Brain abundant, membrane attached signal protein 1                                                |
| P00450 | Ceruloplasmin (ferroxidase)                                                                       |
| O00299 | Chloride intracellular channel 1                                                                  |
| P02774 | Group-specific component (vitamin D binding protein)                                              |
| P47929 | Lectin, galactoside-binding, soluble, 7 (galectin 7)                                              |
| P80188 | Lipocalin 2 (oncogene 24p3)                                                                       |
| Q13421 | Mesothelin                                                                                        |
| Q9HC84 | Mucin 5, subtype B, tracheobronchial                                                              |
| P02787 | Transferrin                                                                                       |
| Q8HXW1 | Transthyretin                                                                                     |
| P18206 | Vinculin                                                                                          |
| O15335 | Chondroadherin                                                                                    |
| P60660 | LC17                                                                                              |
| Q9UN36 | NDRG family member 2                                                                              |
| P37802 | Transgelin 2                                                                                      |
| P15311 | Villin 2 (ezrin)                                                                                  |
| Q2PFY3 | Hypothetical protein (Fragment).                                                                  |
| Q4R4H7 | Brain cDNA, clone: QnpA-14191, similar to human annexin A5 (ANXA5),.                              |
| Q4R4P0 | Brain cDNA, clone: QccE-11243, similar to human cathepsin D (lysosomal aspartyl protease) (CTSD)  |
| Q4R4U0 | Brain cDNA, clone: QccE-18356, similar to human transketolase (Wernicke-Korsakoff syndrome) (TKT) |
| Q4R4X4 | Brain cDNA, clone: QtrA-12155, similar to human vimentin (VIM),.                                  |
| Q4R5M1 | Brain cDNA, clone: QccE-13766, similar to human transferrin (TF),.                                |
| Q4R955 | Testis cDNA clone: QtsA-10685, similar to human I factor (complement) (IF),.                      |
| O15144 | Actin related protein 2/3 complex, subunit 2, 34kDa                                               |
| O95994 | Anterior gradient 2 homolog (Xenopus laevis)                                                      |
| P00747 | Plasminogen                                                                                       |
| P60988 | Prolactin-inducible protein homolog precursor                                                     |
| Q7Z5L0 | Secretory protein LOC284013                                                                       |
| Q13228 | Selenium binding protein 1                                                                        |
| Q9UBC9 | Small proline-rich protein 3                                                                      |
| P35322 | Small proline-rich squamous cell marker                                                           |
| Q5VAN1 | Haptoglobin                                                                                       |
| P04217 | Alpha-1-B glycoprotein                                                                            |
| P25311 | Alpha-2-glycoprotein 1, zinc                                                                      |
| P02765 | Alpha-2-HS-glycoprotein                                                                           |
| P04083 | Annexin A1                                                                                        |
| P07355 | Annexin A2                                                                                        |
| P08133 | Annexin A6                                                                                        |
| P13928 | Annexin A8                                                                                        |

|        |                                                                                                       |
|--------|-------------------------------------------------------------------------------------------------------|
| P02749 | Apolipoprotein H (beta-2-glycoprotein I)                                                              |
| P20160 | Azurocidin 1 (cationic antimicrobial protein 37)                                                      |
| P17213 | Bactericidal/permeability-increasing protein                                                          |
| P27482 | Calmodulin-like 3                                                                                     |
| Q9GLV5 | Cathelin                                                                                              |
| Q9TS45 | Clara cells 10 kDa secretory protein                                                                  |
| P10909 | Clusterin(apolipoprotein J)                                                                           |
| P01024 | Complement component 3                                                                                |
| P01028 | Complement component 4B                                                                               |
| P54108 | Cysteine-rich secretory protein 3                                                                     |
| P00746 | D component of complement (adipsin)                                                                   |
| Q9MYJ3 | Decay-accelerating factor                                                                             |
| P59665 | Defensin, alpha 3, neutrophil-specific                                                                |
| P06744 | Glucose phosphate isomerase                                                                           |
| P02790 | Hemopexin                                                                                             |
| P01834 | Immunoglobulins                                                                                       |
| P02788 | Lactotransferrin                                                                                      |
| P17931 | Lectin, galactoside-binding, soluble, 3 (galectin 3)                                                  |
| P09960 | Leukotriene A4 hydrolase                                                                              |
| P13796 | Lymphocyte cytosolic protein 1 (L-plastin)                                                            |
| P14780 | Matrix metalloproteinase 9 (gelatinase B, 92kDa gelatinase, 92kDa type IV collagenase)                |
| P05164 | Myeloperoxidase                                                                                       |
| P60030 | Neutrophil defensin 1 precursor                                                                       |
| P82317 | Neutrophil defensin 2                                                                                 |
| P30044 | Peroxiredoxin 5                                                                                       |
| Q06323 | Proteasome (prosome, macropain) activator subunit 1 (PA28 alpha)                                      |
| P52566 | Rho GDP dissociation inhibitor (GDI) beta                                                             |
| P60031 | RMAD-3                                                                                                |
| P60032 | RMAD-8                                                                                                |
| P05109 | S100 calcium binding protein A8 (calgranulin A)                                                       |
| P06702 | S100 calcium binding protein A9 (calgranulin B)                                                       |
| P01009 | Serine (or cysteine) proteinase inhibitor, clade A (alpha-1 antiproteinase, antitrypsin), member 1    |
| P01008 | Serine (or cysteine) proteinase inhibitor, clade C (antithrombin), member 1                           |
| P05155 | Serine (or cysteine) proteinase inhibitor, clade G (C1 inhibitor), member 1, (angioedema, hereditary) |
| Q9Y275 | Tumor necrosis factor (ligand) superfamily, member 13b                                                |
| O75083 | WD repeat domain 1                                                                                    |
| P59998 | Actin related protein 2/3 complex, subunit 4                                                          |
| P14550 | Aldo-keto reductase family 1, member A1 (aldehyde reductase)                                          |
| P04075 | Aldolase A, fructose-bisphosphate                                                                     |
| P52907 | Capping protein (actin filament) muscle Z-line, alpha 1                                               |
| P40121 | Capping protein (actin filament), gelsolin-like                                                       |
| P04040 | Catalase                                                                                              |
| P07858 | Cathepsin B                                                                                           |
| Q13231 | Chitinase 1 (chitotriosidase)                                                                         |
| P62937 | Cyclophilin A                                                                                         |
| P06733 | Enolase 1, (alpha)                                                                                    |

|        |                                                                                             |
|--------|---------------------------------------------------------------------------------------------|
| Q14508 | Epididymal secretory protein E4                                                             |
| P13639 | Eukaryotic translation elongation factor 2                                                  |
| Q01469 | Fatty acid binding protein 5 (psoriasis-associated)                                         |
| P00354 | GAPDH                                                                                       |
| P06396 | Gelsolin (amyloidosis, Finnish type)                                                        |
| Q7RTV2 | Glutathione S-transferase A5                                                                |
| P04406 | Glyceraldehyde-3-phosphate dehydrogenase                                                    |
| P04792 | Heat shock 27kDa protein 1                                                                  |
| P11142 | Heat shock 70kDa protein 8                                                                  |
| P07900 | Heat shock 90kDa protein 1, alpha                                                           |
| P22626 | Heterogeneous nuclear ribonucleoprotein A2/B1                                               |
| P16403 | Histone 1, H1c                                                                              |
| P28001 | Histone 1, H2ab                                                                             |
| P62807 | Histone 1, H2bo                                                                             |
| P68431 | Histone 1, H3a                                                                              |
| P62805 | Histone H4                                                                                  |
| P08107 | HSP70-1/HSP70-2                                                                             |
| Q14914 | Leukotriene B4 12-hydroxydehydrogenase                                                      |
| P14174 | Macrophage migration inhibitory factor (MIF) (Phenylpyruvate tautomerase)                   |
| P40925 | Malate dehydrogenase 1, NAD (soluble)                                                       |
| Q8IW41 | Mitogen-activated protein kinase-activated protein kinase 5                                 |
| P30041 | Peroxiredoxin 6                                                                             |
| P52209 | Phosphogluconate dehydrogenase                                                              |
| P00558 | Phosphoglycerate kinase 1                                                                   |
| P18669 | Phosphoglycerate mutase 1 (brain)                                                           |
| P06737 | Phosphorylase, glycogen; liver (Hers disease, glycogen storage disease type VI)             |
| P07237 | Procollagen-proline, 2-oxoglutarate 4-dioxygenase (proline 4-hydroxylase), beta polypeptide |
| Q9GLW7 | Prx-V                                                                                       |
| P14618 | Pyruvate kinase, muscle                                                                     |
| P31949 | S100 calcium binding protein A11 (calgizzarin)                                              |
| P15426 | TIM                                                                                         |
| Q12931 | TNF receptor-associated protein 1                                                           |
| P37837 | Transaldolase 1                                                                             |
| P60174 | Triosephosphate isomerase 1                                                                 |
| P31946 | Tyrosine 3-monooxygenase/tryptophan 5-monooxygenase activation protein, beta polypeptide    |
| P63104 | Tyrosine 3-monooxygenase/tryptophan 5-monooxygenase activation protein, zeta polypeptide    |
| P61088 | Ubiquitin-conjugating enzyme E2N                                                            |
| P30085 | UMP-CMP kinase                                                                              |
| P51451 | B lymphoid tyrosine kinase                                                                  |
| Q01518 | CAP, adenylate cyclase-associated protein 1 (yeast)                                         |
| P23528 | Cofilin 1 (non-muscle)                                                                      |
| P16562 | Cysteine-rich secretory protein 2                                                           |
| P19971 | Endothelial cell growth factor 1 (platelet-derived)                                         |
| P21333 | Filamin A, alpha (actin binding protein 280)                                                |
| P30101 | Glucose regulated protein, 58kDa                                                            |
| P01833 | Polymeric immunoglobulin receptor                                                           |

|        |                                                                                         |
|--------|-----------------------------------------------------------------------------------------|
| P15153 | ras-related C3 botulinum toxin substrate 2 (rho family, small GTP binding protein Rac2) |
| P52565 | Rho GDP dissociation inhibitor (GDI) alpha                                              |
| P25815 | S100 calcium binding protein P                                                          |
| P31947 | Stratifin                                                                               |
| P06753 | TRK-fused gene                                                                          |
| P55072 | Valosin-containing protein                                                              |
